# Supplementary material for: Antioxidant and Polyphenol-Rich Ethanolic Extract of Rubia tinctorum L. Prevents Urolithiasis in an Ethylene Glycol Experimental Model in Rats
Source: MDPI journal article supplement (doi:10.3390/molecules26041005), 2021-02-14
Supplement: s1 [file s1]

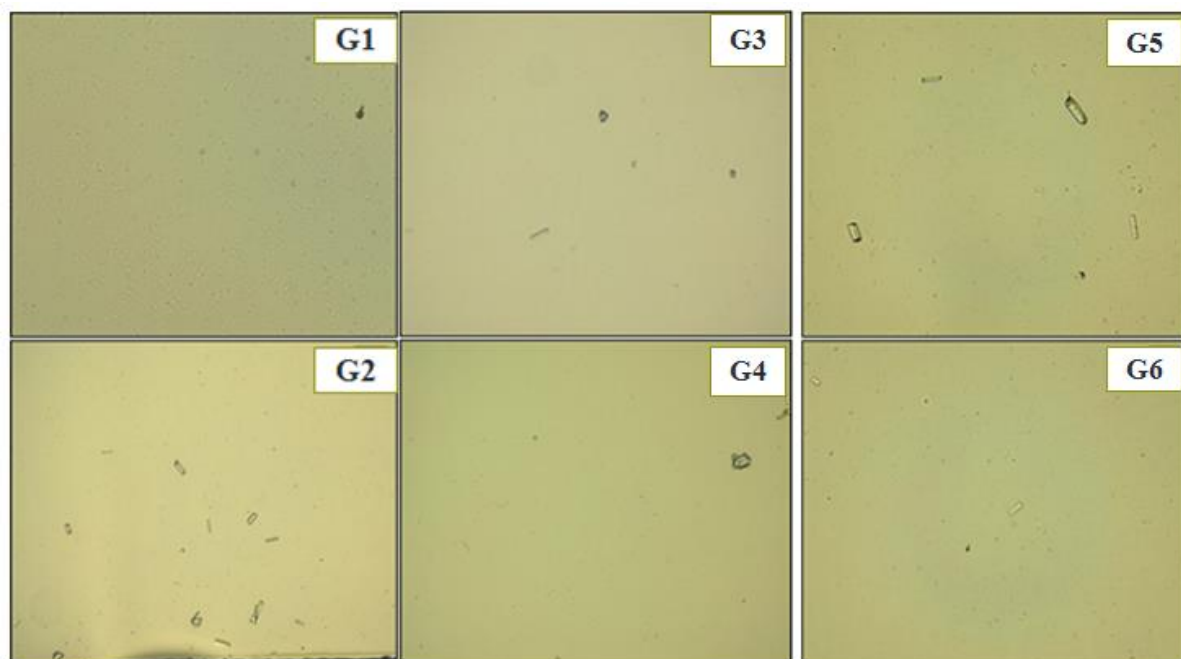

**Figure S1.** Typical calcium oxalate (CaOx) crystals, viewed under light microscope (50×), in 24h urine from rats of vehicle control (**G1**), lithiasic group (**G2**), groups treated with E-RT at 1 g/kg (**G3**) and 2 g/kg (**G4**) and groups treated with EA-RT at 1 g/kg (**G5**) and 2 g/kg (**G6**).

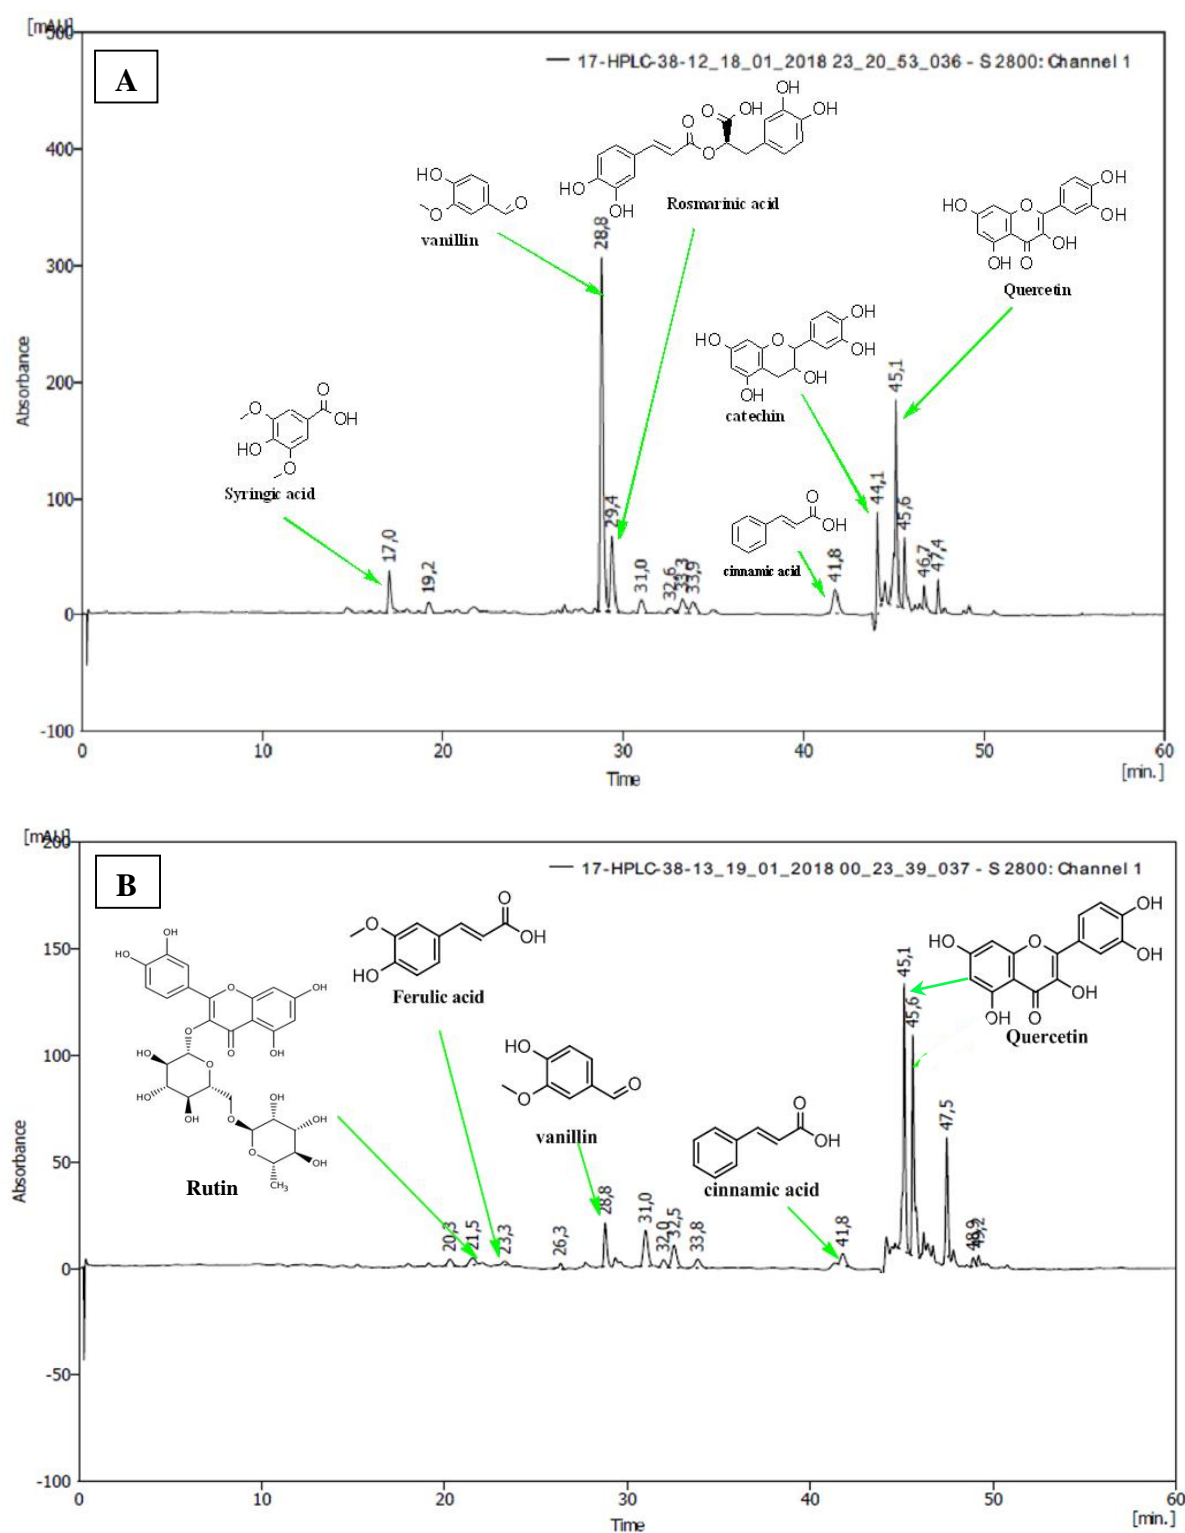

**Figure S2.** HPLC chromatograms of E-RT (A) and EA-RT (B). Syringic Acid (R<sub>t</sub>=17.0), , rutin (R<sub>t</sub>=21.5), ferulic Acid (R<sub>t</sub>=23.3), vanillin (R<sub>t</sub>=28.8), rosmarinic acid (R<sub>t</sub>=29.4), cinnamic acid (R<sub>t</sub>=41.8), catechin (R<sub>t</sub>=44.1), quercetin (R<sub>t</sub>=45.1).
